# Supplementary material
Source: Springer Nature journal article supplement (https://www.springermedizin.de/resource/supplementary/13075_2012_3895_MOESM4_ESM.pdf/9695574)

- ▲— SC Placebo + oral indomethacin (n=75)
- SC Rilonacept + oral indomethacin (n=74)
- SC Rilonacept + oral placebo (n=73)

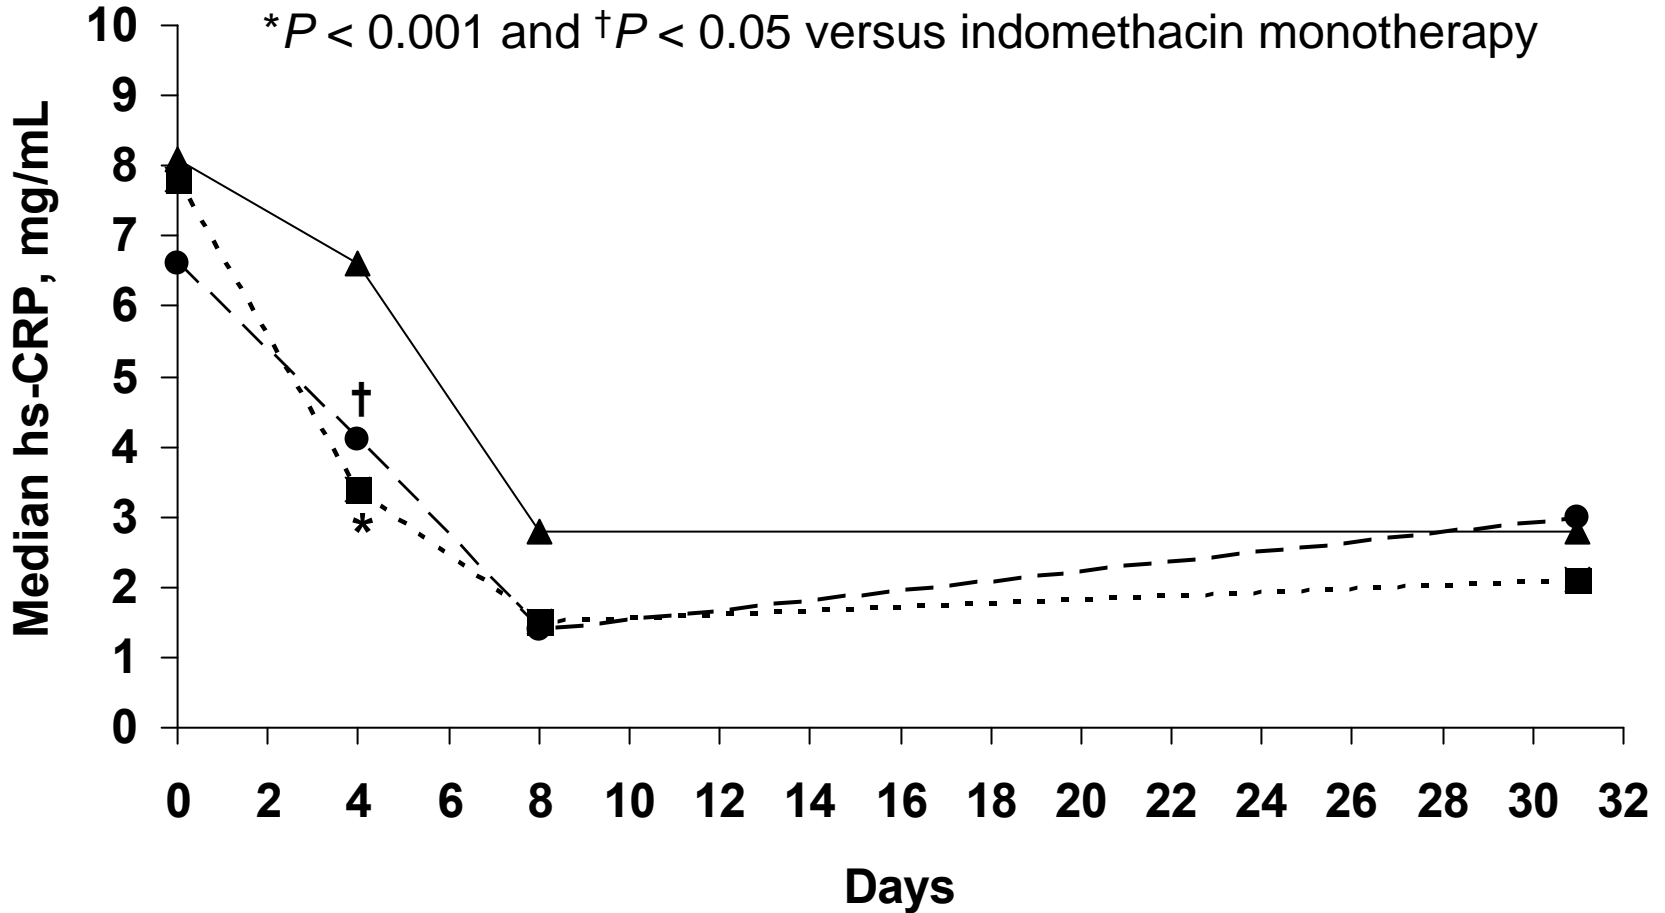

Supplement: MOESM4 [file 9695574]
